# Supplementary figures and images for: Patient Satisfaction: Receiving a copy of the GP letter following fracture or elective orthopaedic clinic
Source: PubMed Central journal article supplement — BMJ Qual Improv Rep. 2013 Dec 11;2(2):u202144.w1085. doi: 10.1136/bmjquality.u202144.w1085 (PMC4663833; doi:10.1136/bmjquality.u202144.w1085), 2013-12-11

### Patient survey responses to questions

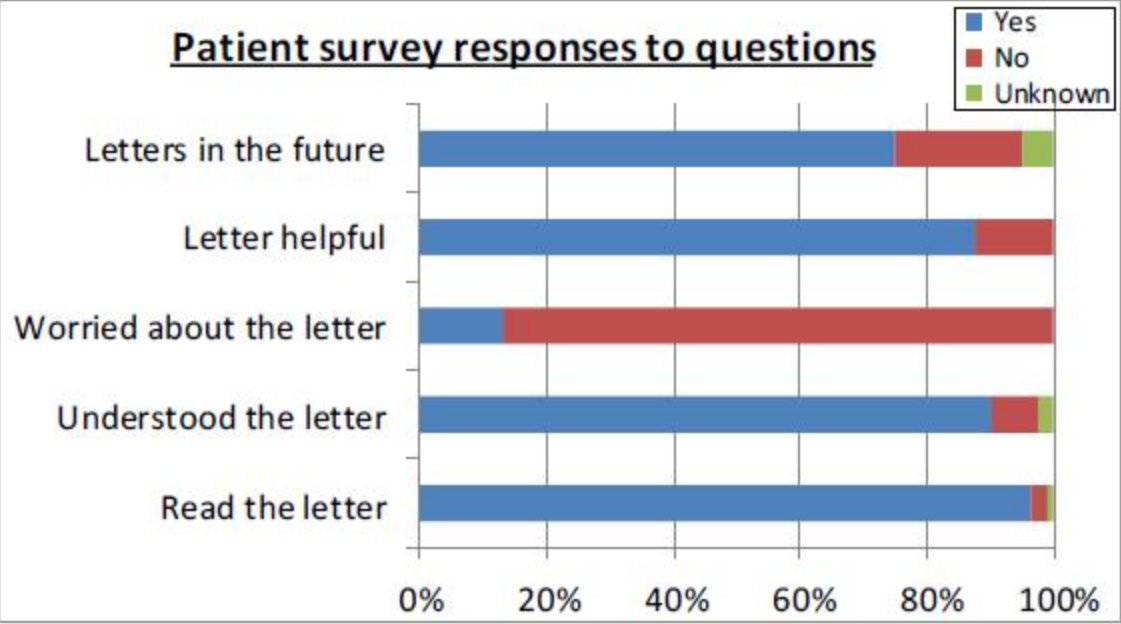

Supplement: bmjqir-2-u202144-w1085-s1.pdf [file bmjqir-2-u202144-w1085-s1.pdf]
